# Supplementary material for: Sorption of Cd2+ on Bone Chars with or without Hydrogen Peroxide Treatment under Various Pyrolysis Temperatures: Comparison of Mechanisms and Performance
Source: MDPI journal article supplement (doi:10.3390/pr10040618), 2022-03-22
Supplement: s1 [file s1]

---

# **Sorption of Cd<sup>2+</sup> on bone chars with or without hydrogen per-oxide treatment under various pyrolysis temperatures: Com-parison of mechanisms and performance**

Qing Guo <sup>1,2</sup>, Hongmei Tang <sup>1,2</sup>, Lu Jiang <sup>1,2</sup>, Meiqing Chen <sup>1,2</sup>, Nengwu Zhu <sup>1,2</sup>,

Pingxiao Wu <sup>1, 2, 3\*</sup>

<sup>1</sup> School of Environment and Energy, South China University of Technology,  
Guangzhou 510006, PR China

<sup>2</sup> The Key Lab of Pollution Control and Ecosystem Restoration in Industry  
Clusters, Ministry of Education, Guangzhou 510006, PR China

<sup>3</sup> Guangdong Provincial Key Laboratory of Solid Wastes Pollution Control and  
Recycling, Guangzhou 510006, PR China

\*Corresponding author: pppxwu@scut.edu.cn

Tel.: +86-20-39380538;

Fax: +86-20-39383725.

E-mail address: pppxwu@scut.edu.cn

---

**Text S1.Characterization of BCs and BCHs**

The surface function groups for adsorbents before and after sorption of heavy metals were measured by a fourier transform infrared spectra (FT-IR, Spectrum Two, Perkin-Elmer, USA) within the wavenumber of 400–4000  $\text{cm}^{-1}$  under solid potassium bromide tablets. The scanning electron microscope (SEM, Carl Zeiss, Germany) was used to observe the morphologies of the samples. Total organic carbon (TOC) was used to evaluate the dissolved organic matter of the samples. The thermogravimetric analysis (TGA) curves were obtained by heating samples from 50 °C to 900 °C at 10 °C/min on the machine (Discovery TGA, TA Instruments, New Castle, DE, USA) under  $\text{N}_2$  flow. The specific surface area was calculated by multipoint Brunauer-Emmett-Teller (BET 3H-2000PM Beijing Co., Ltd.) at 77 K. The crystallinity of the adsorbents before and after heavy metals sorption were determined through the power X-ray diffraction (XRD, D8 advance Sox-I, Bruker Co. USA) with CuK-alpha radiation at 40 kV ( $\lambda = 0.15418 \text{ nm}$ ). Surface elements of the samples were characterized by X-ray photoelectron-spectra (XPS, AES430S, ANELVA, Japan).The zeta potential of adsorbent samples was measurement by a Malvern zetasizer Nano ZS (Malvern Instruments, UK).

**Text S2.Batch sorption experiments**

The details of the experimental method are as follows:

The stock solutions (500 mg/L) of  $\text{Cd}^{2+}$  were prepared by dissolving a quantitative amount of  $\text{Cd}(\text{NO}_3)_2 \cdot 4\text{H}_2\text{O}$ , in deionized water, respectively. The adsorption kinetics was investigated by dispersing 100 mg adsorbents into 200 mL aqueous solution containing  $\text{Cd}^{2+}$  with different initial concentrations (i.e., 10-200 mg/L) under pH = 5.0, I = 0.01 mol/L  $\text{NaNO}_3$  and T = 298 K.

---

Adsorption experiments were performed in a series of 40 mL centrifuge tubes and carried out in an orbital shaker (HNY-100B, Honour instrument shaker, Tianjin, China) with oscillation frequency of 200 rpm/min. In brief, at dosage of various adsorbents, the effect of pH values, and ionic species were investigated by varying the solution pH (2–8), NaCl, NaSO<sub>4</sub> and NaF concentration (10 mmol/L), and the initial Cd(II) concentrations in the aqueous solutions were 50 (with BC(H)-700-900), 100 (with BC(H)-500), 120 mg/L (with BC(H)-300-0).

The solution pH was adjusted by negligible volume of 0.001~0.1 mol/L HNO<sub>3</sub>/NaOH solutions.

The adsorption isotherm experiments were carried out by vigorously shaking 40 mL of different cadmium solution (from 5 to 200 mg/L) mixed with 20 mg BCs and BCHs for 48 h to reach equilibrium at pH = 5.0, I = 0.01 mol/L NaNO<sub>3</sub> and T = 298 K.

After the sorption experiment equilibrium achieved, the supernatants were filtrated with 0.45 μm filter membrane and measured the Cd<sup>2+</sup> and Ca<sup>2+</sup> concentration (C<sub>e</sub>, mg/L) by flame atomic absorption spectrometry (FAAS, AA-6880, Shimadzu, Japan). The sorption capacity (q<sub>e</sub>, mg/g) were calculated from the initial (C<sub>0</sub>, mg/L) and final equilibrium concentration (C<sub>e</sub>) of metal ions as well as the adsorbents dosage (m/V, g/L) of the uptake system with the following equation:  $q_e = (C_0 - C_e) \times V / m$ .

### **Text S3. Analytical methods**

Adsorption kinetics. The experimental adsorption kinetic data was fitted by pseudo-first order and pseudo-second order models to evaluate the potential sorption mechanism.

pseudo-first-order (eq S1):

$$\ln(q_e - q_t) = \ln q_e - k_1 t \quad (S1)$$

pseudo-second-order (eq S2):

---


$$\frac{t}{q_t} = \frac{1}{k_2 q_e^2} + \frac{t}{q_e} \quad (S2)$$

Adsorption isotherm models and thermodynamics. Langmuir isotherm (eq S3) and Freundlich isotherm model (eq S4) can be described as the following non-linear equations, respectively

$$q_e = \frac{b q_{e,\max} C_e}{1 + b C_e} \quad (S3)$$

$$q_e = K_F C_e^n \quad (S4)$$

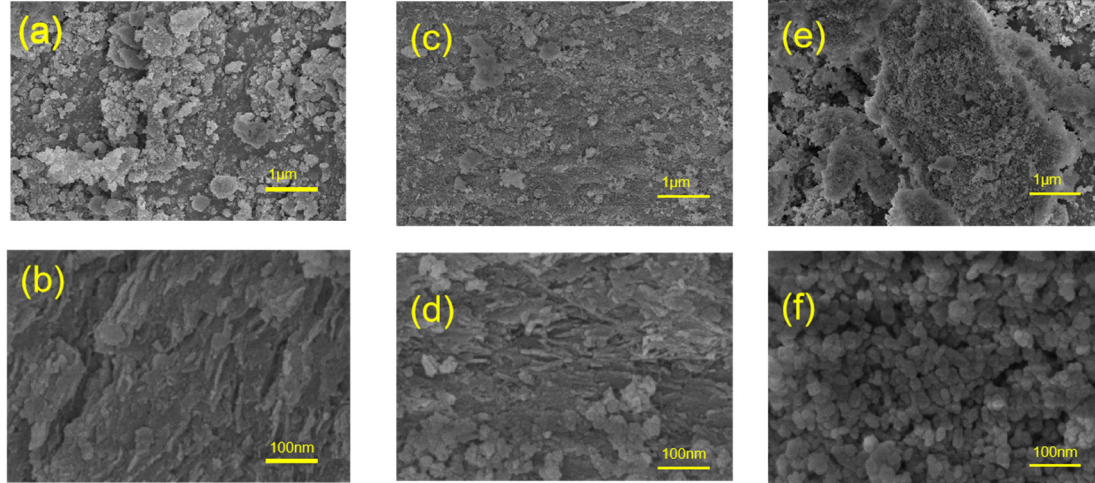

**Figure S1.** The SEM images of BC and BCH samples: BCH(a, b), BC-500(c, d), BC-700(e, f).

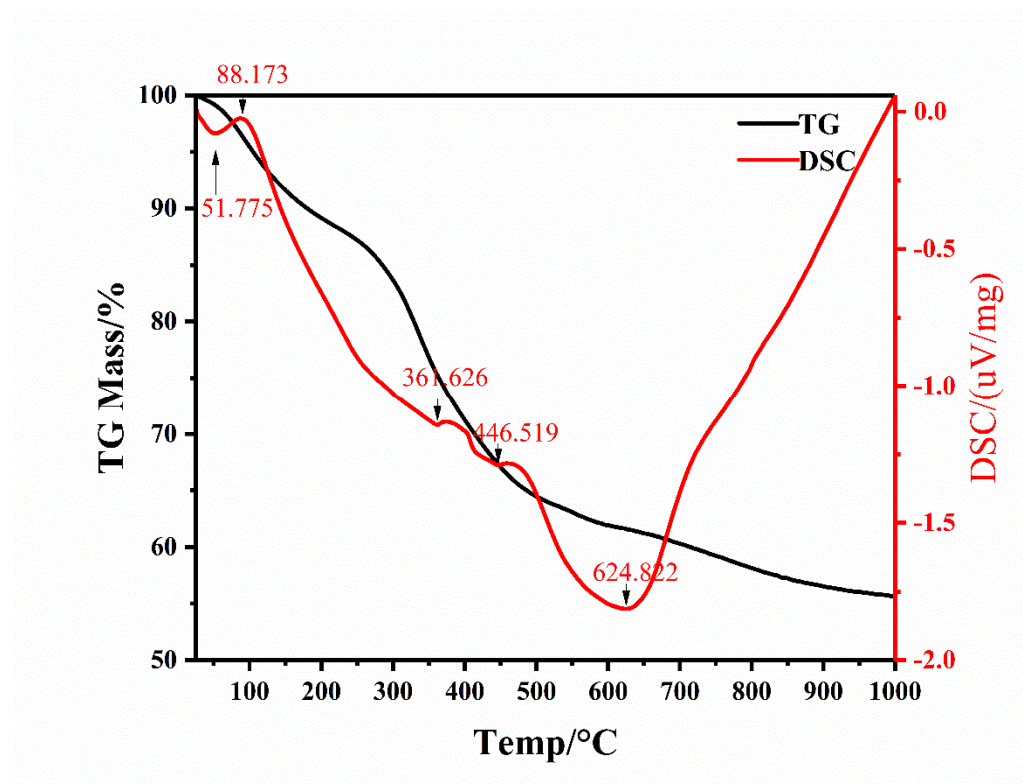

Figure S2.DTA/TGA analysis of bone sample.

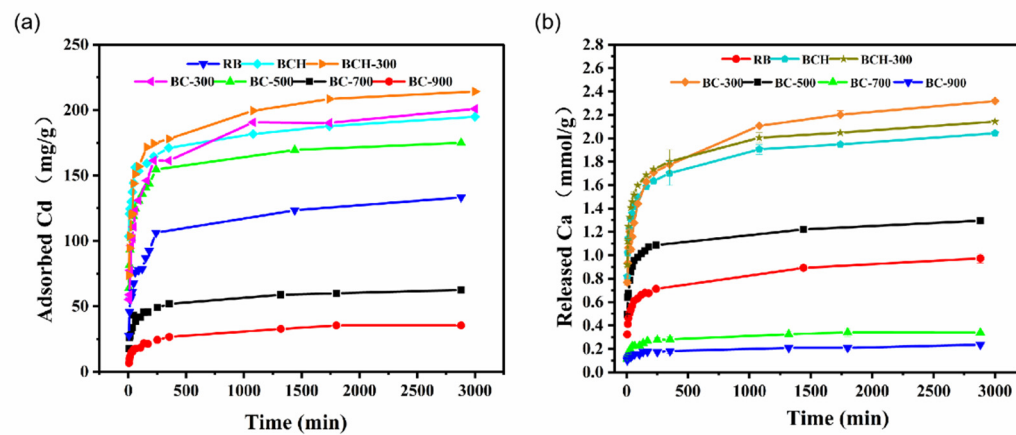

**Figure S3.**Effect of contact time on amounts of Cd<sup>2+</sup> adsorbed (a) and Ca<sup>2+</sup> released from adsorbents (b).

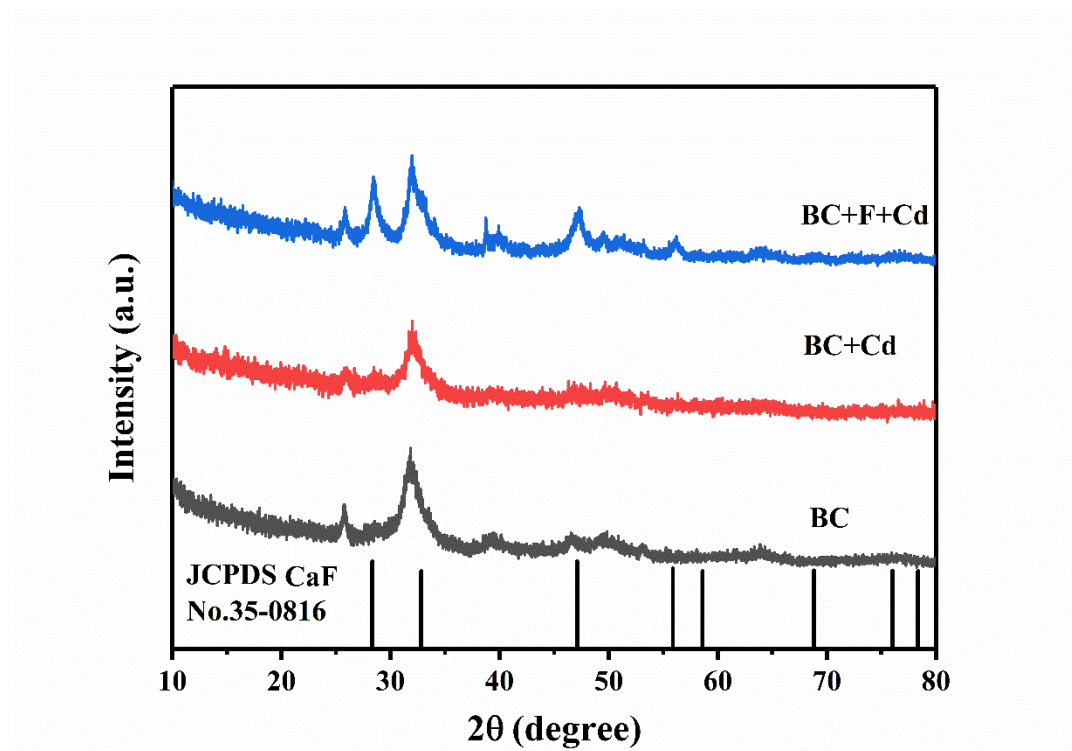

**Figure S4.** The XRD spectra of adsorbent after adsorbed  $\text{Cd}^{2+}$  with 10mmol/L NaF.

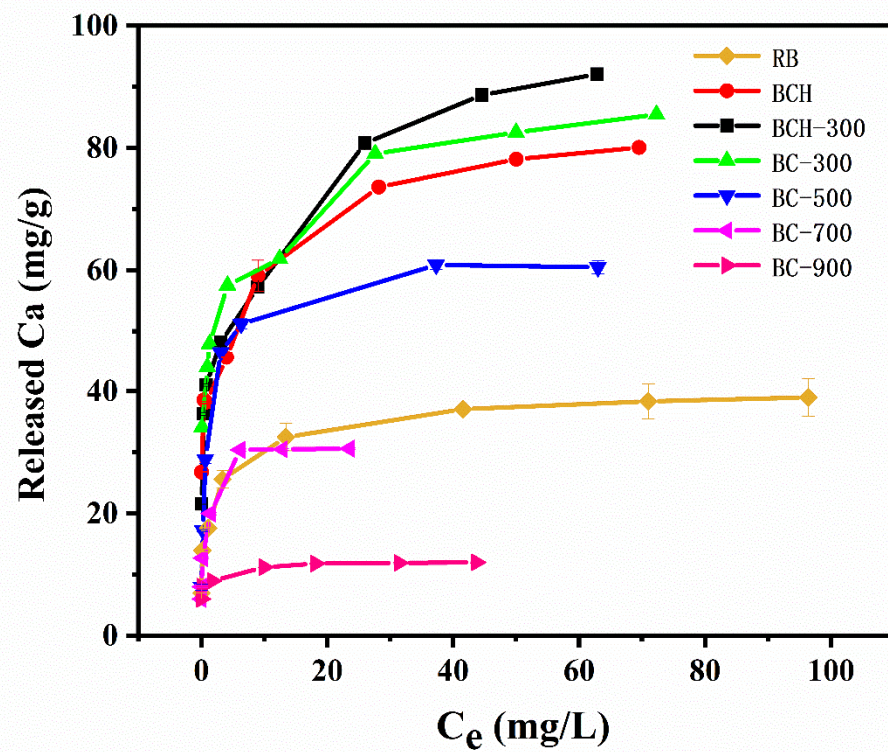

**Figure S5.** The relationships between equilibrium Cd<sup>2+</sup> concentrations and the amounts of Ca<sup>2+</sup> released from adsorbents.



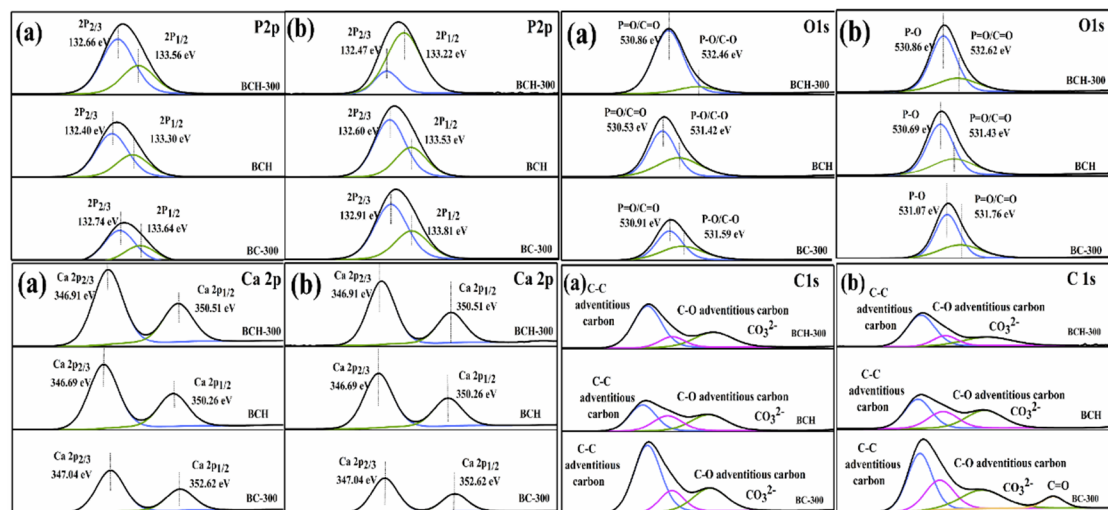

**Figure S6.** The spectra of BCs before and after adsorbed Cd: XPS spectra: (a) P2p spectra, (b) O1 s spectra, (c) Ca 2p spectra, (d) C 1s spectra.

**Table S1.** Properties and adsorption capacity of bone char samples

| Adsorben | Cd <sup>2+</sup> | uptake, | Degree        | of | Specific surface | Zeta potential | Organic parameters |          | Other elements |          |          |
|----------|------------------|---------|---------------|----|------------------|----------------|--------------------|----------|----------------|----------|----------|
| ts       | mg/g             |         | crystallinity |    | area             | (pH=6)         | Doc                | C (w.t%) | Ca (w.t%)      | P (w.t%) | O (w.t%) |
| RB       | 105.02           |         | 0.26          |    | 10.347           | -7.21          | 60.25±0.35         | 47.12    | 4.19           | 5.18     | 43.51    |
| BCH      | 208.56           |         | 0.27          |    | 171.664          | -19.76         | 1.92±0.12          | 22.37    | 12.22          | 10.14    | 55.27    |
| BCH-300  | 228.73           |         | 0.27          |    | 172.926          | -23.11         | 1.32±0.14          | 16.40    | 14.06          | 22.60    | 46.94    |
| BC-300   | 196.35           |         | 0.27          |    | 50.247           | -25.21         | 30.25±0.35         | 42.26    | 6.92           | 6.75     | 44.07    |
| BC-500   | 170.92           |         | 0.36          |    | 77.313           | -19.76         | 11.73±0.07         | 33.25    | 12.14          | 9.69     | 44.92    |
| BC-700   | 82.35            |         | 0.38          |    | 158.478          | -25.14         | 4.11±0.01          | 15.32    | 15.17          | 11.21    | 58.30    |
| BC-900   | 47.71            |         | 0.67          |    | 108.248          | -23.11         | 3.67±0.11          | 13.22    | 17.18          | 10.21    | 59.39    |

**Table S2.** Pseudo-first-order and pseudo-second-order kinetic parameters for Cd<sup>2+</sup> adsorbed on adsorbents form aqueous solution.

| Adsorbents | Pseudo-first order |                    |                | Pseudo-second order  |                    |                |
|------------|--------------------|--------------------|----------------|----------------------|--------------------|----------------|
|            | k <sub>1</sub>     | q <sub>e,cal</sub> | R <sup>2</sup> | k <sub>2</sub> (g/mg | q <sub>e,cal</sub> | R <sup>2</sup> |
|            | (1/min)            | (mg/g)             |                | min)                 | (mg/g)             |                |
| RB         | 0.101              | 105.02             | 0.957          | 0.0018               | 104.21             | 0.999          |
| BCH        | 0.202              | 208.56             | 0.986          | 0.0015               | 208.18             | 0.999          |
| BCH-300    | 0.211              | 228.73             | 0.954          | 0.0017               | 228.68             | 0.999          |
| BC-300     | 0.153              | 196.35             | 0.978          | 0.0019               | 197.77             | 0.999          |
| BC-500     | 0.128              | 170.92             | 0.986          | 0.0021               | 168.77             | 0.999          |
| BC-700     | 0.075              | 82.35              | 0.957          | 0.0055               | 82.96              | 0.998          |
| BC-900     | 0.061              | 47.71              | 0.987          | 0.0064               | 47.25              | 0.999          |

**Table S3.** Langmuir and Freundlich parameters for Cd<sup>2+</sup> adsorbed on adsorbents from aqueous solution.

| Adsorbents | Langmuir constants    |                         |                | Freundlich constants                           |       |                |
|------------|-----------------------|-------------------------|----------------|------------------------------------------------|-------|----------------|
|            | K <sub>L</sub> (L/mg) | q <sub>max</sub> (mg/g) | R <sup>2</sup> | K <sub>F</sub> (mg/g)<br>(L/mg) <sup>1/n</sup> | n     | R <sup>2</sup> |
| RB         | 1.76                  | 113.43                  | 0.991          | 3.33                                           | 0.605 | 0.969          |
| BCH        | 0.51                  | 276.70                  | 0.992          | 5.76                                           | 0.568 | 0.972          |
| BCH-300    | 0.46                  | 293.31                  | 0.994          | 10.4                                           | 0.533 | 0.959          |
| BC-300     | 0.43                  | 247.33                  | 0.995          | 6.05                                           | 0.594 | 0.912          |
| BC-500     | 1.14                  | 197.34                  | 0.988          | 3.24                                           | 0.566 | 0.975          |
| BC-700     | 0.53                  | 108.23                  | 0.995          | 5.98                                           | 0.562 | 0.969          |
| BC-900     | 0.58                  | 82.77                   | 0.997          | 3.33                                           | 0.605 | 0.957          |
