# Supplementary material for: Sorption of Cd2+ on Bone Chars with or without Hydrogen Peroxide Treatment under Various Pyrolysis Temperatures: Comparison of Mechanisms and Performance
Source: MDPI journal article supplement (doi:10.3390/pr10040618), 2022-03-22
Supplement: s1 [file s1]

Archive with 1 entries (1 files):
- processes-1650539-supplementary.pdf
